# Supplementary material
Source: PubMed Central journal article supplement (PMC4924623)
Supplement: NIHMS796478-supplement-Supplemental_Figure_2.pdf [file NIHMS796478-supplement-Supplemental_Figure_2.pdf]

## Supplemental Figure 2

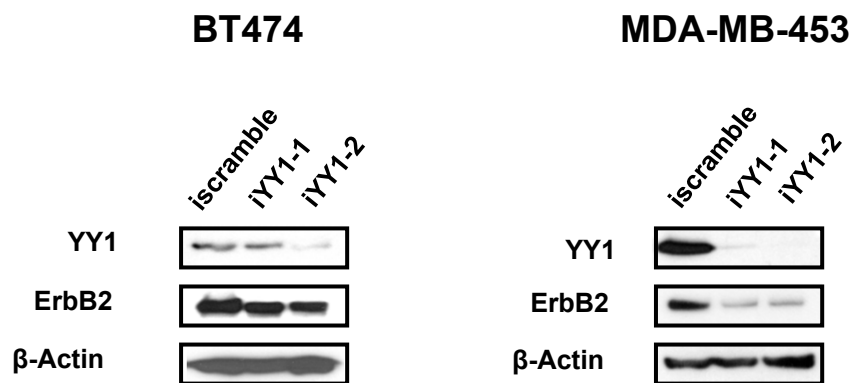

**Supplemental Figure 2.** Knockdown of YY1 decreases protein levels of ErbB2 in BT474 and MDA-MB-453 cells. Cells were transfected with siRNA for YY1 for 72 hr, and whole cell lysates were analyzed by western blots as described in the Materials and Methods.
