# Supplementary material
Source: PubMed Central journal article supplement (PMC4924623)
Supplement: NIHMS796478-supplement-Supplemental_Figure_3.pdf [file NIHMS796478-supplement-Supplemental_Figure_3.pdf]

## Supplemental Figure 3

### RKO (36 hr treatment)

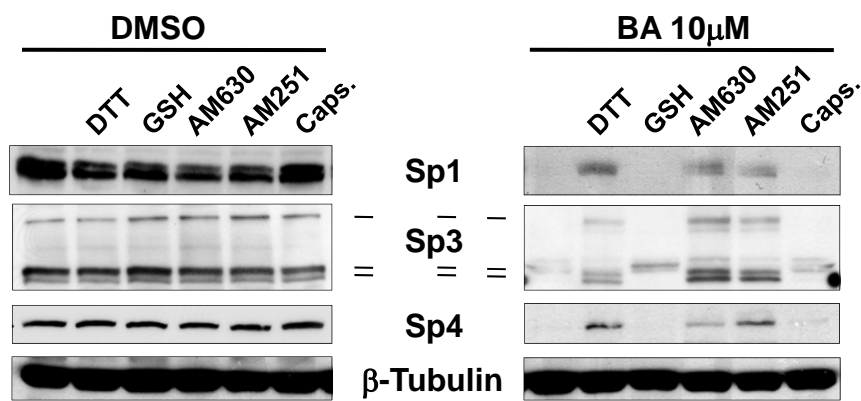

**Supplemental Figure 3.** BA-mediated downregulation of Sp1, Sp3 and Sp4 partially blocked by CB receptor antagonists. RKO colon cancer cells were treated with DMSO or 10  $\mu$ M BA alone or in combination with DTT, glutathione (GSH), 5  $\mu$ M AM630, 5  $\mu$ M AM251, and 2  $\mu$ M capsazepine. Whole cell lysates were analyzed by western blots.
